# Supplementary material for: Mixed cyclo di-amino acids structured edible oils: a potential hardstock fat mimic
Source: Royal Society of Chemistry journal article supplement (doi:10.1039/d3sm00849e), 2023-01-01
Supplement: d3sm00849e1.pdf [file d3sm00849e1.pdf]

Supplemental Information for: **Mixed cyclo di-amino acids structured edible oils: A potential hardstock fat mimic**

Sultani, A., Ghazani, S.M., Marangoni, A.G., Joye, I.J., Corradini, M.G., & Rogers, M.A.

Table S1: The Hansen solubility parameters of each solvents tested for CdAA self-assembly.

| <b>Solvents</b>      | <b><math>\delta_d</math> (MPa<sup>1/2</sup>)</b> | <b><math>\delta_p</math> (MPa<sup>1/2</sup>)</b> | <b><math>\delta_h</math> (MPa<sup>1/2</sup>)</b> |
|----------------------|--------------------------------------------------|--------------------------------------------------|--------------------------------------------------|
| Salicylaldehyde      | 19.0                                             | 10.5                                             | 12.0                                             |
| Dimethyl sulfoxide   | 18.4                                             | 16.4                                             | 10.2                                             |
| O-xylene             | 17.8                                             | 1.0                                              | 3.1                                              |
| Isobutyl alcohol     | 15.1                                             | 5.7                                              | 15.9                                             |
| Triethylene glycol   | 16.0                                             | 12.5                                             | 18.6                                             |
| Butylamine           | 16.2                                             | 4.5                                              | 8.0                                              |
| Hexanoic acid        | 16.3                                             | 4.2                                              | 11.5                                             |
| Dichlorotoluene      | 19.8                                             | 9.8                                              | 2.5                                              |
| Tetramethylurea      | 16.7                                             | 8.2                                              | 11.0                                             |
| Carbon tetrachloride | 17.8                                             | 0                                                | 0.6                                              |
| Benzyl methacrylate  | 16.8                                             | 4.1                                              | 4.1                                              |
| Chloroform           | 17.8                                             | 3.1                                              | 5.7                                              |
| Triethylamine        | 15.5                                             | 0.4                                              | 1.0                                              |
| Hexane               | 14.9                                             | 0.001                                            | 0.001                                            |
| Benzene              | 18.4                                             | 0.001                                            | 2.0                                              |
| Acetone              | 15.5                                             | 10.4                                             | 7.0                                              |
| Acetonitrile         | 15.3                                             | 18.0                                             | 6.1                                              |
| Pyridine             | 19.0                                             | 8.8                                              | 5.9                                              |
| Toluene              | 18.0                                             | 1.4                                              | 2.0                                              |
| Dichloromethane      | 17.0                                             | 7.3                                              | 7.1                                              |
| Ethanol              | 15.8                                             | 8.8                                              | 19.4                                             |
| Dimethyl formamide   | 17.4                                             | 13.7                                             | 11.3                                             |
| Water                | 15.8                                             | 16.0                                             | 42.3                                             |
| Triolein             | 16.6                                             | 2.1                                              | 2.3                                              |
| Canola oil           | 16.5                                             | 2.1                                              | 2.6                                              |

Table S2: Gelation outcomes of 5 wt.% CdAA gelators in solvents (gel (G), precipitate (P), solution (S)).

|                      | Leu-Glu | Phe-Leu | Phe-Tyr | Ser-Asp | Lys-Glu | Gln-Tyr |
|----------------------|---------|---------|---------|---------|---------|---------|
| Salicylaldehyde      | G       | G       | G       | S       | G       | G       |
| Dimethyl sulfoxide   | S       | S       | S       | S       | P       | S       |
| O-xylene             | G       | G       | P       | P       | P       | G       |
| Isobutyl alcohol     | P       | G       | P       | P       | P       | P       |
| Triethylene glycol   | S       | G       | P       | S       | P       | S       |
| Butylamine           | S       | S       | P       | S       | P       | S       |
| Hexanoic acid        | S       | S       | P       | S       | P       | G       |
| Dichlorotoluene      | G       | S       | P       | P       | S       | P       |
| Tetramethylurea      | S       | S       | P       | S       | P       | S       |
| Carbon tetrachloride | P       | G       | P       | P       | P       | P       |
| Benzyl methacrylate  | G       | G       | P       | P       | P       | G       |
| Acetophenone         | G       | G       | P       | P       | P       | G       |
| Chloroform           | P       | G       | P       | P       | P       | P       |
| Triethylamine        | S       | P       | P       | P       | P       | P       |
| Hexane               | P       | P       | P       | P       | P       | P       |
| Benzene              | P       | G       | P       | P       | P       | S       |
| Acetone              | P       | G       | P       | P       | P       | G       |
| Acetonitrile         | G       | G       | P       | P       | P       | G       |
| Pyridine             | S       | S       | G       | S       | P       | G       |
| Toluene              | P       | G       | P       | P       | P       | P       |
| Dichloromethane      | P       | G       | P       | P       | P       | P       |
| Ethanol              | P       | G       | G       | S       | P       | G       |
| Dimethyl formamide   | S       | S       | P       | S       | P       | G       |
| Water                | P       | G       | P       | S       | S       | G       |
| Triolein             | S       | G       | P       | P       | P       | P       |
| Canola oil           | P       | G       | P       | P       | P       | P       |

Table S3: CdAAs gelation results reported in literature and tested in sufficient solvents to determine the Hansen coordinates of the minimum enclosing sphere containing either gels (G), solutions (S), or precipitate (P)).

|                    | Leu-Leu | Phe-Phe | Tyr-Tyr | Trp-Trp | Gly-Ala | Gly-Val | Gly-Leu | Gly-Phe | Val-Val | Val-Leu | Leu-Leu | Phe-Leu | Phe-Phe | Tyr-Lys |
|--------------------|---------|---------|---------|---------|---------|---------|---------|---------|---------|---------|---------|---------|---------|---------|
| Dimethyl sulfoxide | S       | P       | S       | S       |         |         |         |         |         |         |         |         |         | G       |
| O-xylene           | P       | P       | P       | P       |         |         |         |         |         |         |         |         |         |         |
| Tetramethylurea    | S       | P       | S       | P       |         |         |         |         |         |         |         |         |         |         |
| Chloroform         | P       | P       | P       | G       | P       | P       | P       | P       | S       | G       | S       | S       | P       |         |
| Hexane             | P       | P       | P       | P       |         |         |         |         |         |         |         |         |         |         |
| Benzene            | G       | P       | P       | P       | P       | P       | P       | P       | S       | P       | G       | S       | P       |         |
| Acetone            |         |         |         |         | P       | P       | P       | P       | P       | P       | S       | S       | P       | P       |
| Acetonitrile       | G       | P       | P       | P       |         |         |         |         |         |         |         |         |         |         |
| Pyridine           | S       | P       | S       | S       |         |         |         |         |         |         |         |         |         |         |
| Toluene            | P       | P       | P       | P       | P       | P       | P       | P       | S       | S       | G       | G       | P       |         |
| Ethanol            |         |         |         |         | P       | G       | S       | P       | P       | S       | S       | S       |         | P       |
| Dimethyl           | S       | P       | S       | S       |         |         |         |         |         |         |         |         |         | G       |
| Water              | P       | P       | G       | P       |         |         |         |         |         |         |         |         |         | G       |
| Triolein           |         |         |         |         | P       | G       | G       | G       | S       | P       | P       | G       | P       |         |
| Canola oil         | P       | P       | P       | P       |         |         |         |         |         |         |         |         |         |         |
| Benzaldehyde       | G       | P       | P       | S       |         |         |         |         |         |         |         |         |         |         |
| Ethyl acetate      | G       | P       | P       | P       | P       | P       | P       | P       | P       | S       | P       | S       | P       |         |
| Isopropanol        | G       | P       | G       | P       |         |         |         |         |         |         |         |         |         |         |
| Propylene glycol   | G       | P       | G       | S       |         |         |         |         |         |         |         |         |         |         |
| Ethylene glycol    | G       | P       | P       | S       |         |         |         |         |         |         |         |         |         |         |
| Hexanol            | G       | P       | P       | P       |         |         |         |         |         |         |         |         |         | P       |
| Glycerol           | P       | P       | G       | P       |         |         |         |         |         |         |         |         |         |         |
| Methanol           |         |         |         |         | P       | S       | S       | P       | P       | S       | S       | S       | P       |         |
| Tetrachloromethane |         |         |         |         | P       | P       | P       | P       | S       | P       | S       | P       | P       |         |
| Cyclohexane        |         |         |         |         | P       | P       | P       | P       | P       | P       | P       | P       | P       |         |
| Methoxybenzene     |         |         |         |         | P       | G       | S       | S       | P       | P       | P       | G       | P       |         |
| Chlorobenzene      |         |         |         |         | P       | P       | S       | P       | P       | P       | P       | G       | P       |         |
| Nitrobenzene       |         |         |         |         | S       | G       | S       | G       | P       | P       | P       | G       | P       |         |
| Tricaprylin        |         |         |         |         | P       | G       | P       | G       | P       | P       | P       | G       | P       |         |
| Soybean oil        |         |         |         |         | P       | G       | G       | G       | P       | P       | G       | G       | P       |         |
| Silicone oil       |         |         |         |         | G       | G       | G       | G       | S       | G       | G       | G       | G       |         |
| Dimethylacetamide  |         |         |         |         |         |         |         |         |         |         |         |         |         | G       |
| Piperidine         |         |         |         |         |         |         |         |         |         |         |         |         |         | G       |
| Butanol            |         |         |         |         |         |         |         |         |         |         |         |         |         | P       |

1) Y. Lan, M. Lv, S. Guo, P. Nasr, V. Ladizhansky, R. Vaz, M. G. Corradini, T. Hou, S. M. Ghazani, A. Marnangoni and M. A. Rogers, *Soft Matter*, 2019, 15, 9205-9214.

2) K. Hanabusa, M. Matsumoto, M. Kimura, A. Kakehi and H. Shirai, *J Colloid Interface Sci*, 2000, 224, 231-244.

3) Z. Xie, A. Zhang, L. Ye and Z. G. Feng, *Soft Matter*, 2009, 5;1474-1482.

Table S4: The radius and coordinates for the center of the sphere enclosing all CdAA-solvent solution (s), gel (g), and precipitate (p) outcomes in Hansen space.

|         | State | $2\delta_d$<br>(MPa <sup>1/2</sup> ) | $\delta_p$<br>(MPa <sup>1/2</sup> ) | $\delta_h$<br>(MPa <sup>1/2</sup> ) | Radius<br>(MPa <sup>1/2</sup> ) |
|---------|-------|--------------------------------------|-------------------------------------|-------------------------------------|---------------------------------|
| Mixed   | S     | 32.7                                 | 9.5                                 | 22.2                                | 21.2                            |
|         | G     | 35.5                                 | 6.3                                 | 7.3                                 | 6.8                             |
|         | P     | 31.9                                 | 7.1                                 | 8.4                                 | 11.2                            |
| Leu-Glu | S     | 31.9                                 | 6.9                                 | 9.5                                 | 8.9                             |
|         | G     | 33.1                                 | 9.5                                 | 4.6                                 | 9.0                             |
|         | P     | 30.7                                 | 8.0                                 | 21.2                                | 22.6                            |
| Phe-Leu | S     | 35.9                                 | 9.6                                 | 8.5                                 | 7.0                             |
|         | G     | 33.6                                 | 8.0                                 | 21.5                                | 22.4                            |
|         | P     | 30.4                                 | 0.2                                 | 0.5                                 | 0.81                            |
| Phe-Tyr | S     | N/A                                  | N/A                                 | N/A                                 | N/A                             |
|         | G     | 34.8                                 | 8.8                                 | 12.6                                | 7.5                             |
|         | P     | 30.7                                 | 8.0                                 | 21.2                                | 22.6                            |
| Ser-Asp | S     | 34.8                                 | 12.4                                | 24.1                                | 18.8                            |
|         | G     | N/A                                  | N/A                                 | N/A                                 | N/A                             |
|         | P     | 32.1                                 | 7.9                                 | 6.1                                 | 10.2                            |
| Lys-Glu | S     | 35.6                                 | 12.9                                | 22.4                                | 20.5                            |
|         | G     | N/A                                  | N/A                                 | N/A                                 | N/A                             |
|         | P     | 31.8                                 | 7.0                                 | 8.7                                 | 11.3                            |
| Gln-Tyr | S     | 34.4                                 | 6.3                                 | 10.3                                | 10.7                            |
|         | G     | 33.6                                 | 8.5                                 | 22.7                                | 21.1                            |
|         | P     | 32.9                                 | 5.2                                 | 7.0                                 | 9.3                             |
| Leu-Leu | S     | 36.1                                 | 11.7                                | 9.2                                 | 4.8                             |
|         | G     | 34.7                                 | 7.3                                 | 13.1                                | 13.4                            |
|         | P     | 30.7                                 | 8.1                                 | 21.1                                | 22.6                            |
| Phe-Phe | S     | N/A                                  | N/A                                 | N/A                                 | N/A                             |
|         | G     | N/A                                  | N/A                                 | N/A                                 | N/A                             |
|         | P     | 30.7                                 | 8.0                                 | 21.2                                | 22.6                            |
| Tyr-Tyr | S     | 36.1                                 | 11.7                                | 9.2                                 | 4.8                             |
|         | G     | 31.6                                 | 11.1                                | 29.3                                | 13.9                            |
|         | P     | 31.9                                 | 5.6                                 | 13.0                                | 14.3                            |
| Trp-Trp | S     | 36.4                                 | 9.2                                 | 15.7                                | 10.8                            |
|         | G     | N/A                                  | N/A                                 | N/A                                 | N/A                             |
|         | P     | 30.7                                 | 8.0                                 | 21.2                                | 22.6                            |
| Gly-Ala | S     | N/A                                  | N/A                                 | N/A                                 | N/A                             |
|         | G     | N/A                                  | N/A                                 | N/A                                 | N/A                             |
|         | P     | 32.4                                 | 6.4                                 | 11.3                                | 12.8                            |
| Gly-Val | S     | N/A                                  | N/A                                 | N/A                                 | N/A                             |
|         | G     | 33.6                                 | 6.4                                 | 10.6                                | 9.4                             |
|         | P     | 33.3                                 | 5.2                                 | 3.8                                 | 6.5                             |
| Gly-Leu | S     | 34.1                                 | 8.3                                 | 12.1                                | 11.6                            |
|         | G     | 33.1                                 | 2.1                                 | 2.5                                 | 0.01                            |
|         | P     | 33.3                                 | 5.2                                 | 3.8                                 | 6.5                             |
| Gly-Phe | S     | N/A                                  | N/A                                 | N/A                                 | N/A                             |
|         | G     | 36.5                                 | 5.3                                 | 3.4                                 | 4.9                             |
|         | P     | 32.4                                 | 6.1                                 | 11.3                                | 12.8                            |
| Val-Val | S     | 35.6                                 | 1.6                                 | 3.2                                 | 3.0                             |
|         | G     | N/A                                  | N/A                                 | N/A                                 | N/A                             |
|         | P     | 31.9                                 | 6.2                                 | 11.3                                | 12.8                            |
| Val-Leu | S     | 35.1                                 | 6.9                                 | 12.2                                | 11.9                            |
|         | G     | N/A                                  | N/A                                 | N/A                                 | N/A                             |
|         | P     | 34.1                                 | 5.7                                 | 3.5                                 | 6.6                             |
| Tyr-Lys | S     | N/A                                  | N/A                                 | N/A                                 | N/A                             |
|         | G     | 33.0                                 | 10.6                                | 25.5                                | 17.8                            |
|         | P     | 31.3                                 | 9.6                                 | 13.2                                | 6.3                             |

Table S5: Gelation results for 5 wt.% mixed CdAAs in canola oil (precipitate (P), gel (G)).

| Number of CdAAs | Leu-Glu | Phe-Tyr | Ser-Asp | Lys-Glu | Gln-Tyr | Outcome |
|-----------------|---------|---------|---------|---------|---------|---------|
| 2               | X       | X       |         |         |         | P       |
|                 | X       |         | X       |         |         | P       |
|                 |         |         |         | X       | X       | P       |
|                 |         |         | X       |         | X       | P       |
|                 |         |         | X       | X       |         | P       |
| 3               |         |         | X       | X       | X       | P       |
|                 | X       | X       | X       |         |         | P       |
| 4               |         | X       | X       | X       | X       | G       |
|                 | X       |         | X       | X       | X       | G       |
|                 | X       | X       |         | X       | X       | G       |
|                 | X       | X       | X       |         | X       | G       |
|                 | X       | X       | X       | X       |         | G       |
| 5               | X       | X       | X       | X       | X       | G       |
